# Supplementary material for: Functional and Structural Features of Disease-Related Protein Variants
Source: PubMed Central journal article supplement (PMC6479756; doi:10.3390/ijms20071530), 2019-03-27
Supplement: ijms-20-01530-s001.pdf [file ijms-20-01530-s001.pdf]

**Table S1.** HVAR3D: Protein Chains and their variations as a function of the CATH structural classes.

| CATH Class              | #Protein Chains | #D-SRVs | #N-SRVs |
|-------------------------|-----------------|---------|---------|
| Mainly alpha            | 42              | 606     | 428     |
| Mainly beta             | 42              | 637     | 79      |
| Alpha and beta          | 167             | 2207    | 266     |
| Few secondary structure | 1               | 1       | 1       |
| Multi-class             | 130             | 1955    | 250     |
| Non annotated           | 10              | 131     | 20      |
| Total                   | 392             | 5577    | 1044    |

CATH Protein structural classification (<http://www.cathdb.info/>); # Disease and Neutral single residue variation.

**Table S2.** HVAR3D: the Reactome pathways.

| Reactome Pathway                       | #Protein Chains | #D-SRVs | #N-SRVs |
|----------------------------------------|-----------------|---------|---------|
| Cell cycle                             | 2               | 3       | 0       |
| Cell-cell communication                | 1               | 12      | 2       |
| Cellular responses to external stimuli | 1               | 1       | 1       |
| Developmental biology                  | 1               | 1       | 7       |
| DNA repair                             | 7               | 20      | 23      |
| Extracellular matrix organization      | 2               | 66      | 3       |
| Gene expression                        | 4               | 94      | 21      |
| Hemostasis                             | 2               | 7       | 31      |
| Immune system                          | 27              | 461     | 55      |
| Metabolism                             | 134             | 2349    | 220     |
| Metabolism of proteins                 | 28              | 425     | 46      |
| Metabolism of RNA                      | 6               | 22      | 1       |
| Muscle contraction                     | 3               | 22      | 8       |
| Neural system                          | 6               | 51      | 13      |
| Organelle biogenesis and maintenance   | 4               | 31      | 4       |
| Protein localization                   | 3               | 143     | 8       |
| Signal transduction                    | 14              | 73      | 15      |
| Transport of small molecules           | 10              | 132     | 37      |
| Vesicle-mediated transport             | 3               | 38      | 14      |
| Multiple REACTOME codes                | 97              | 1241    | 494     |
| Non annotated                          | 37              | 385     | 41      |
| Total                                  | 392             | 5577    | 1044    |

Reactome Pathway database: <https://reactome.org/>

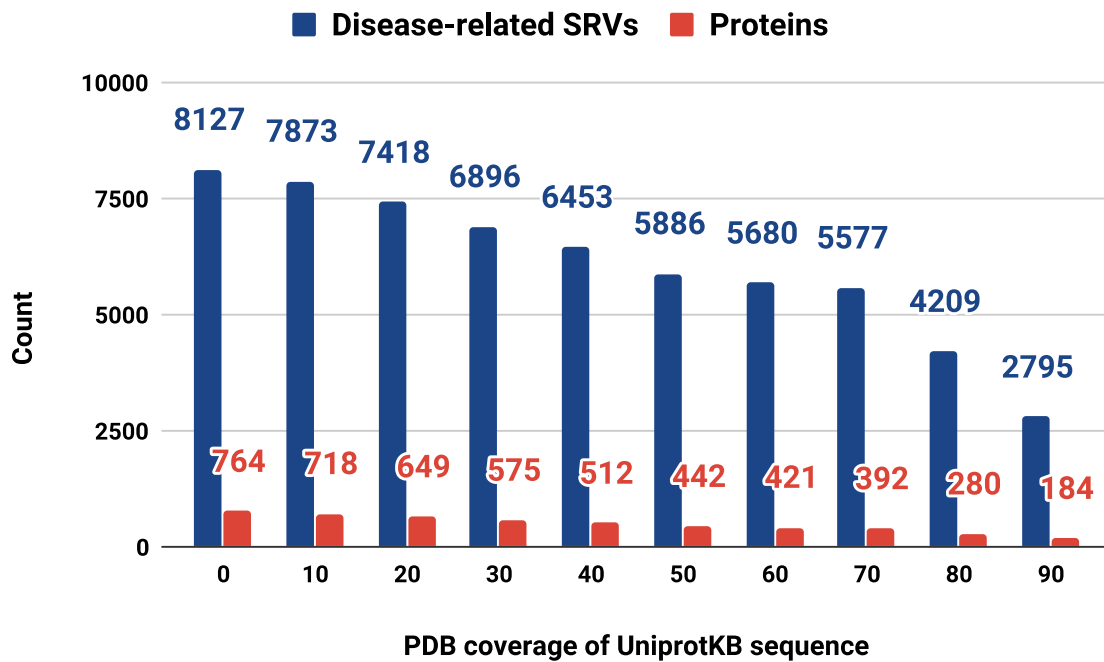

**Figure S1.** Disease related single residue variations as a function of the PDB structure to UniprotKB corresponding sequence. Blue numbers are SVRs and red ones are protein chains.

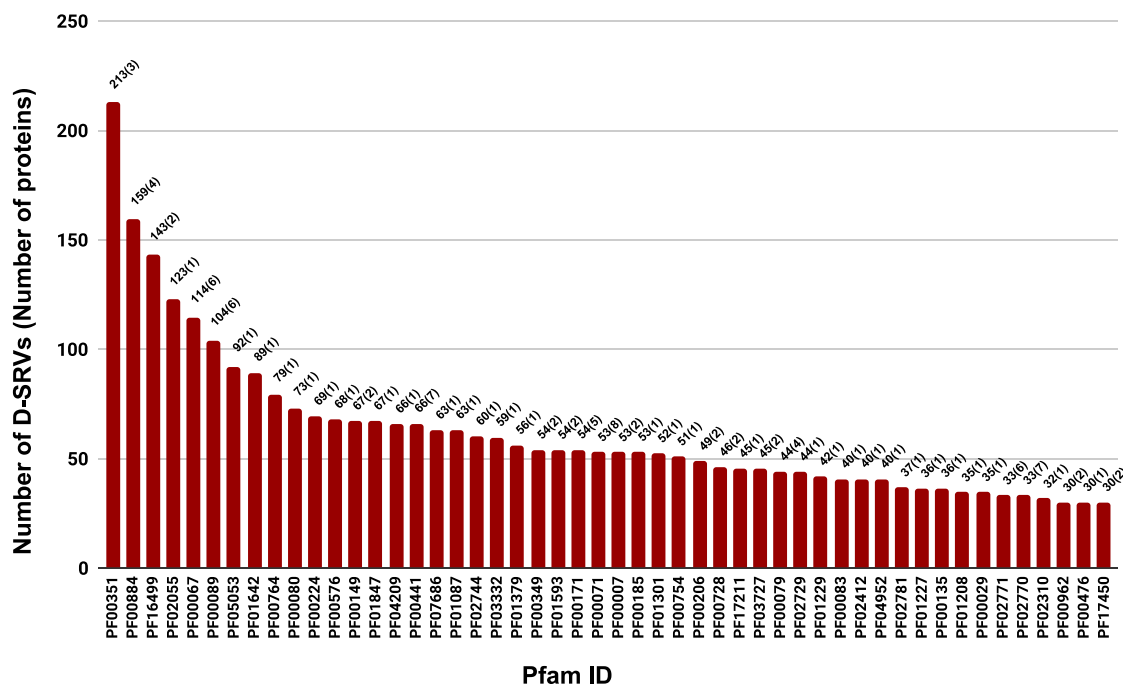

**Figure S2.** Bar plot distribution of disease SVRs in protein chains (number) per Pfam domain. Only 50 Pfam domains covering at least 30 SRVs, of the total 357 domains in HVAR3D, are shown.
